# Supplementary material
Source: HighWire-hosted journal article supplement (https://delf06.com/highwire/filestream/93909/field_highwire_adjunct_files/0/bmjopen_Appendix_000019.pdf)
Supplement: bmjopen_Appendix_000019.pdf [file bmjopen_Appendix_000019.pdf]

**Supplemental Table A. Logistic Regression modeling for pulmonary exacerbations in mild CF lung disease using inhaled HS**

|                                               | Wald  | Odds Ratio (OR) | Confidence Intervals for OR |        | <i>p</i> value |
|-----------------------------------------------|-------|-----------------|-----------------------------|--------|----------------|
|                                               |       |                 | Lower                       | Upper  |                |
| <b>Age</b>                                    | 2.898 | 1.044           | 0.993                       | 1.097  | 0.089          |
| <b>FEV<sub>1</sub><sup>a</sup></b>            | 2.001 | 0.944           | 0.872                       | 1.022  | 0.157          |
| <b>FVC<sup>b</sup></b>                        | 1.197 | 1.056           | 0.958                       | 1.163  | 0.274          |
| <b>BMI<sup>c</sup></b>                        | 2.105 | 1.096           | 0.968                       | 1.242  | 0.147          |
| <b>Gender</b>                                 | 0.362 | 0.731           | 0.263                       | 2.028  | 0.547          |
| <b>Inhaled HS<sup>d</sup> use</b>             | 8.139 | 0.173           | 0.052                       | 0.577  | 0.004          |
| <b>Sputum positivity for Pseudomonas</b>      | 4.569 | 3.305           | 1.104                       | 9.892  | 0.033          |
| <b>Sputum positivity for MRSA<sup>e</sup></b> | 2.312 | 2.748           | 0.747                       | 10.113 | 0.128          |

<sup>a</sup> FEV1 = Forced Expiratory Volume in One Second

<sup>b</sup> FVC = Forced Vital Capacity

<sup>c</sup> BMI = Body Mass Index

<sup>d</sup> HS = Hypertonic Saline

<sup>e</sup> MRSA = Methicillin Resistant Staphylococcus Aureus

**Supplemental Table B. Logistic Regression modeling for pulmonary exacerbations in moderate CF lung disease using inhaled HS**

|                                               | Wald   | Odds Ratio (OR) | Confidence Intervals for OR |       | <i>p</i> value |
|-----------------------------------------------|--------|-----------------|-----------------------------|-------|----------------|
|                                               |        |                 | Lower                       | Upper |                |
| <b>Age</b>                                    | 0.378  | 1.012           | 0.974                       | 1.052 | 0.538          |
| <b>FEV<sub>1</sub><sup>a</sup></b>            | 23.369 | 0.892           | 0.851                       | 0.934 | < 0.001        |
| <b>FVC<sup>b</sup></b>                        | 5.709  | 1.073           | 1.013                       | 1.136 | 0.017          |
| <b>BMI<sup>c</sup></b>                        | 1.644  | 1.088           | 0.956                       | 1.237 | 0.2            |
| <b>Gender</b>                                 | 4.385  | 0.41            | 0.178                       | 0.945 | 0.036          |
| <b>Inhaled HS<sup>d</sup> use</b>             | 4.508  | 0.39            | 0.164                       | 0.93  | 0.034          |
| <b>Sputum positivity for Pseudomonas</b>      | 1.663  | 1.966           | 0.704                       | 5.495 | 0.197          |
| <b>Sputum positivity for MRSA<sup>e</sup></b> | 1.027  | 1.86            | 0.56                        | 6.176 | 0.311          |

<sup>a</sup> FEV1 = Forced Expiratory Volume in One Second

<sup>b</sup> FVC = Forced Vital Capacity

<sup>c</sup> BMI = Body Mass Index

<sup>d</sup> HS = Hypertonic Saline

<sup>e</sup> MRSA = Methicillin Resistant Staphylococcus Aureus

**Supplemental Table C. Logistic Regression modeling for pulmonary exacerbations in severe CF lung disease using inhaled HS**

|                                               | Wald  | Odds Ratio (OR) | Confidence Intervals for OR |          | <i>p</i> value |
|-----------------------------------------------|-------|-----------------|-----------------------------|----------|----------------|
|                                               |       |                 | Lower                       | Upper    |                |
| <b>Age</b>                                    | 0.098 | 0.988           | 0.916                       | 1.066    | 0.754          |
| <b>FEV<sub>1</sub><sup>a</sup></b>            | 0.608 | 0.769           | 0.397                       | 1.489    | 0.436          |
| <b>FVC<sup>b</sup></b>                        | 0.692 | 1.192           | 0.788                       | 1.804    | 0.406          |
| <b>BMI<sup>c</sup></b>                        | 0.339 | 0.877           | 0.564                       | 1.364    | 0.56           |
| <b>Gender</b>                                 | 2.724 | 5.756           | 0.72                        | 46.007   | 0.099          |
| <b>Inhaled HS<sup>d</sup> use</b>             | 5.911 | 0.017           | 0.001                       | 0.452    | 0.015          |
| <b>Sputum positivity for Pseudomonas</b>      | 4.620 | 53.471          | 1.42                        | 2013.278 | 0.032          |
| <b>Sputum positivity for MRSA<sup>e</sup></b> | 5.081 | 0.051           | 0.004                       | 0.677    | 0.024          |

<sup>a</sup> FEV1 = Forced Expiratory Volume in One Second

<sup>b</sup> FVC = Forced Vital Capacity

<sup>c</sup> BMI = Body Mass Index

<sup>d</sup> HS = Hypertonic Saline

<sup>e</sup> MRSA = Methicillin Resistant Staphylococcus Aureus
